# Supplementary material for: Synthesis, characterisation and properties of bismuth(iii) ester pendant arm picket porphyrins
Source: Royal Society of Chemistry journal article supplement (doi:10.1039/b308776j), 2003-01-01
Supplement: b308776j.doc [file b308776j.doc]

# Synthesis, characterisation and properties of bismuth(III) ester pendant arms picket porphyrins

Zakaria Halime, Lydie Michaudet, Mathieu Razavet, Christian Ruzié and Bernard Boitrel*

*Institut de Chimie, UMR CNRS 6509, Université de Rennes 1, Av. du Général Leclerc, Campus de Beaulieu, 35042 Rennes cedex, France. Fax: 02 2323 5637; Tel: 02 2323 6372; E-mail: Bernard.Boitrel@univ-rennes1.fr*

**Porphyrin ligands**

**-5,10,15,20-Tetrakis{2-[2-(ethoxycarbonyl)acetylamido]phenyl}-porphyrin 2**: TAPP (0.3 g, 0.4 mmol) was poured into a two-necked flask and dissolved in 30 mL freshly distilled THF under argon. 0.5 mL distilled Et3N were added and this was followed by addition of ethyl malonyl chloride (0.34 mL, 2.6 mmol) at room temperature. The mixture was stirred overnight and solvent was evaporated to dryness. The residue was dissolved in a minimum CH2Cl2 to be poured on a silica gel chromatography column loaded with CH2Cl2. Product was eluted with a 1.5% CH3OH/CH2Cl2 mixture and obtained in 65% yield (290 mg, 0.25 mmol). Microanalysis: C64H58N8O12, found (calc): C, 67.60 (67.95); H, 4.14 (4.17); N, 9.60 (9.91)%. FAB-MS: *m/z* = 1130.7 [M]+. FTIR (KBr, cm-1): 1741 (CO)ester, 1686 (CO)amide. UV-VIS (CH2Cl2,  nm, 10-3 , M-1cm-1): 419 (392.5), 513 (20.4), 547 (5.0), 588 (6.3), 644 (1.9). 1H NMR (CDCl3, 323K, 500 MHz) : *H*8.84 (8H, s,-pyr.), 8.57 (4H, d, *J* = 7.1 Hz, aro.), 8.01 (4H, d, *J* = 6.9 Hz, aro.), 7.91 (4H, s, -HCO), 7.87 (4H, td, *J* = 1.47 Hz, *J* = 7.5 Hz, aro.), 7.57 (4H, td, *J* = 1.1 Hz, *J* = 7.3 Hz, aro.), 2.86 (8H, large s, -**CH2**CH3), 2.66 (8H, large s, -CH2-), 0.28 (12H, large s, -CH2**CH3**), -2.64 (2H, s, -NH pyr). 13C NMR (CDCl3, 320K, 125 MHz): *C* 167.5, 163.4, 147.5, 138.5, 135.4, 132.9, 131.9, 130.2, 124.2, 123.2, 115.4, 61.0, 43.4, 13.3.

**-5,10,15,20-Tetrakis{2-[4-(methoxycarbonyl)butanoylamido]phenyl}-porphyrin 3**: TAPP (0.32 g, 0.4 mmol) was poured into a two-necked flask and dissolved in 30 mL freshly distilled THF under argon. Distilled Et3N (0.5 mL) was added and this was followed by addition of methyl glutaryl chloride (0.328 mL, 2.3 mmol) at room temperature. The mixture was stirred overnight and solvent was evaporated to dryness. The residue was dissolved in a minimum CH2Cl2 to be poured on a silica gel chromatography column loaded with CH2Cl2. Product was eluted with a 1% CH3OH/CH2Cl2 mixture and obtained in 83% yield (460 mg, 0.39 mmol). Microanalysis: C68H66N8O12•H2O, found(calc): C, 67.46 (67.55); H, 4.44 (4.58); N, 9.37 (9.41)%. FAB-MS: *m/z* = 1187.1 [M]+. FTIR (KBr, cm-1): 1732 (CO)ester, 1684 (CO)amide. UV-VIS (CH2Cl2,  nm, 10-3 , M-1cm-1) : 420 (361.7), 514 (20.2), 547 (4.6), 588 (5.9), 643 (1.8). 1H NMR (CDCl3, 320K, 500 MHz) : *H* 8.85 (8H, s, -pyr.), 8.62 (4H, d, *J* = 6.36 Hz, aro.) ; 7.95 (4H, d, *J* = 7.3 Hz, aro.), 7.86 (4H, t, *J* = 7.8 Hz, aro.), 7.54 (4H, t, *J* = 7.34 Hz, aro.), 7.19 (4H, s, -NHCO), 3.01 (12H, s, -CH3), 1.74 (8H, t, *J* = 6.8 Hz, -CH2-), 1.60 (8H, large s, -CH2-), 1.34 (8H, m, -CH2-), -2.69 (2H, s, -NH pyr). 13C NMR (CDCl3, 320K, 125 MHz): *C* 173.1, 170.7, 147.6, 138.8, 135.5, 132.1, 130.2, 123.8, 123.0, 115.8, 51.2, 35.8, 32.6, 20.5.

**-5,10,15-Tris(2-aminophenyl)--20-[2-(acetylamido)phenyl]-porphyrin 4**, **-5,15-bis{4-aminophenyl}--10,20-bis[4-(acetylamido)phenyl]-porphyrin 5**, **-5,10-bis{4-aminophenyl}--15,20-bis[4-(acetylamido)phenyl]-porphyrin 6**, and **-5,10,15-tris(4-(acetylamido)phenyl)--20-[4-aminophenyl]-porphyrin 7**: In a 1L two-necked flask flushed with argon, TAPP (1 g, 1.48 mmol) was dissolved in 500 mL freshly distilled THF to which anhydrous Et3N (382 L, 5.46 mmol) was added. The mixture was cooled to 0°C and acetyl chloride (190 L, 2.66 mmol) was added dropwise over an hour. After stirring for another hour, the solution was allowed to warm up to room temperature and the solvent was evaporated to dryness. The residue was dissolved in CH2Cl2 and washed twice with a 5% NaOH solution. The organic extract was evaporated to a minimum CH2Cl2 to be poured on a silica gel chromatography column loaded with CH2Cl2. Unreacted TAPP was collected first with a 1% CH3OH/CH2Cl2 mixture, compound 4 was eluted with 1.25% CH3OH, isomers 5 and 6 were collected simultaneously with 1.5% CH3OH and product 7 was eluted with 2% CH3OH. Each fraction was concentrated to dryness and dissolved in a minimum CH2Cl2 to which pentane was added. This allowed precipitation of the products which were filtered, washed with more pentane and finally dried under vacuum overnight. 4, (5, 6) and 7 were obtained as powders in 21%, 54% and 24% yield respectively. 4: Microanalysis: C46H36N8O•2H2O, found (calc): C, 73.80 (73.39); H, 4.92 (5.36); N, 15.10 (14.88). FAB-MS: *m/z* = 716.7[M]+. FTIR (KBr, cm-1): 3460 (-NH2), 1673 (CO). UV-VIS (CH2Cl2, ** nm, 10-3 , M-1cm-1): 419 (173.9), 513 (11.0), 545 (3.1), 587 (4.2), 643 (2.1). 1H NMR (CDCl3, 300K, 500 MHz): *H* 8.96 (4H,br s, -pyr.), 8.95 (2H, d, *J* = 4.5 Hz, -pyr.), 8.81 (2H, d, *J* = 4.5 Hz, -pyr.), 8.72 (2H, d, *J* = 8.5 Hz, aro.), 8.01 (2H, d, *J* = 7.0 Hz, aro.), 7.90 (3H, d, *J* = 7.0 Hz, aro.), 7.86 (1H, t, *J* = 7.5 Hz, aro.), 7.65 (1H, t, *J* = 8 Hz, aro.), 7.53 (1H, t, *J* = 8 Hz, aro.), 7.21 (3H, t, *J* = 7.5 Hz, aro.), 7.15 (3H, d, *J* = 7.0 Hz, aro.), 6.82 (1H, s, -NHCO), 3.56 (6H, br s, -NH2), 1.26 (3H, s, -CH3), -2.66 (2H, s, -NH pyr). 13C NMR (CDCl3, 300K, 125 MHz): **168.6, 147.1, 138.9, 135.2, 132.0, 131.4, 130.3, 130.1, 127.0, 123.3, 121.5, 118.2, 116.9, 116.8, 115.8, 113.8, 24.7. 5 and 6 cannot be isolated separately thus no spectroscopic data could be obtained at this stage. 7: ESI-HRMS: calc *m/z* = 823.3121 [M+Na]+, found 823.3121. FTIR (KBr, cm-1): 3414 (-NH2); 1671 (CO). UV-VIS (CH2Cl2,  nm, 10-3 , M-1cm-1): 419 (309.4), 515 (4.7), 548 (1.4), 588 (1.7), 645 (0.7). 1H NMR (CDCl3, 283K, 500 MHz): *H*9.02 (2H,s, -pyr.), 8.87(6H, s, -pyr.), 8.7 (3H, t, *J* = 8.0 Hz, aro.), 7.99 (3H, t, *J* = 7.5 Hz, aro.), 7.88 (4H, t, *J* = 7.0 Hz, aro.), 7.67 (1H, t, *J* = 7.5 Hz, aro.), 7.54 (3H, t, *J* = 7.5 Hz, aro.), 7.23 (1H, t, *J* = 7.5 Hz, aro.), 7.19 (1H, d, *J* = 8 Hz, aro.), 6.84 (2H, s, -NHCO), 6.81 (1H, s, -NHCO), 3.51 (2H, br s, -NH2), 1.29 (9H, s, -CH3), -2.77 (2H, s, -NH pyr). 13C NMR (CDCl3, 298K, 125 MHz): *C*176.2, 175.1, 174.4, 172.0, 170.1, 167.9, 146.6, 138.4, 134.9, 130.1, 126.1, 123.1, 121.4, 115.6, 24.18.

**-5,10,15-Tris{2-[3-(ethoxycarbonyl)propionylamido]phenyl}--20-[2-(acetylamido)phenyl]-porphyrin 8**: **4** (0.37 g, 0.4 mmol) was dissolved in 30 mL freshly distilled THF under argon. 10 equivalents anhydrous Et3N (0.3 mL, 4 mmol) were added and the mixture was cooled to 0°C. Ethyl succinyl chloride (230 L, 1.6 mmol) was then added and this was stirred overnight. Solvent was evaporated to dryness and the residue dissolved in a minimum CH2Cl2 to be poured on a silica gel chromatography column. Product was eluted with a 0.8% CH3OH/CH2Cl2 mixture and obtained in 92% yield (407 mg, 0.37 mmol). Microanalysis: C64H60N8O10, found (calc): C, 69.62 (69.80); H, 4.36 (4.49); N, 10.29 (10.18)%. FAB-HRMS: calc *m/z* = 1123.4330 [M+Na]+, found 1123.4324. FTIR (KBr, cm-1): 1738 (CO)ester, 1682 (CO)amide. UV-VIS (CH2Cl2, ** nm, 10-3 , M-1cm-1): 419 (337.4), 514 (17.8), 546 (4.3), 588 (5.6), 643 (1.7). 1H NMR (CDCl3, 283K, 500 MHz): *H* 8.86 (8H, s, -pyr.), 8.66 (2H, d, *J* = 8.7 Hz, aro.), 8.65 (2H, d, *J* = 8.4 Hz, aro.), 8.00 (2H, d, *J* = 7.6 Hz, aro.), 7.97 (2H, d, *J* = 7.8 Hz, aro.), 7.88 (2H, t, *J* = 7.4 Hz, aro.), 7.87 (2H, t, *J* = 7.3 Hz, aro.), 7.56 (2H, t, *J* = 7.8 Hz, aro.), 7.55 (2H, t, *J* = 7.5 Hz, aro.), 7.02 (2H, s, -NHCO), 6.99 (2H, s, -NHCO), 3.47 (4H, q, *J* = 6.2 Hz, -**CH2**CH3), 2.21(4H, t, *J* = 6.5 Hz, -CH2CH2-), 1.72 (4H, br s, -CH2CH2-), 1.32 (6H, br s, -CH3), 0.81 (6H, t, *J* = 6.2 Hz, -CH2**CH3**), -2.5 (2H, s, -NH pyr). 13C NMR (CDCl3, 273K, 125 MHz): *C*172.3, 169.7, 168.4, 147.6, 139.0, 138.7, 135.4, 132.1, 130.3, 123.7, 122.5, 115.8, 115.5, 60.6, 31.7, 29.1, 23.7, 14.1.

**-5,15-Bis{2-[3-(ethoxycarbonyl)propionylamido]phenyl}--10,20-bis[2-(acetylamido)phenyl] porphyrin 9** and **-5,10-bis{2-[3-(ethoxycarbonyl)propionylamido]phenyl}--15,20-bis[2-(acetylamido)phenyl] porphyrin 10**: The same experimental procedure to that of compound 8 was applied here with only a minor modification. 3 equivalents of ethyl succinyl chloride (57 L, 0.396 mmol) were added to the mixture containing 5 and 6 (0.1 g, 0.132 mmol) in THF. Products were easily separated by silica gel chromatography column and obtained in 20% yield (26 mg, 0.026 mmol) for 9 and 72% yield (96 mg, 0.095 mmol) for 10.

**9**: Microanalysis: C60H54N8O8•H2O, found (calc): C, 70.02 (69.75); H, 4.42 (4.46); N, 10.93 (10.85)%. FAB-HRMS: calc *m/z* = 1015.4143 [M+H]+, found 1015.4144. FTIR (KBr, cm-1): 1738 (CO)ester, 1682 (CO)amide. UV-VIS (CH2Cl2, ** nm, 10-3 , M-1cm-1): 419 (337.7), 513 (19.7), 546 (5.2), 588 (6.7), 643 (2.3). 1H NMR (CDCl3, 323K, 500 MHz): *H* 8.86 (8H, s, -pyr.), 8.66 (2H, d, *J* = 8.7 Hz, aro.), 8.65 (2H, d, *J* = 8.4 Hz, aro.), 8.00 (2H, d, *J* = 7.6 Hz, aro.), 7.97 (2H, d, *J* = 7.8 Hz, aro.), 7.88 (2H, t, *J* = 7.4 Hz, aro.), 7.87 (2H, t, *J* = 7.3 Hz, aro.), 7.56 (2H, t, *J* = 7.8 Hz, aro.), 7.55 (2H, t, *J* = 7.5 Hz, aro.), 7.02 (2H, s, -NHCO), 6.99 (2H, s, -NHCO), 3.47 (4H, q, *J* = 6.2 Hz, -**CH2**CH3); 2.21(4H, t, *J* = 6.5 Hz, -CH2CH2-), 1.72 (4H, br s, -CH2CH2-), 1.32 (6H, br s, -CH3), 0.81 (6H, t, *J* = 6.2 Hz, -CH2**CH3**), -2.5 (2H, s, -NH pyr). 13C NMR (CDCl3, 300K, 125 MHz): *C*172.3, 169.7, 168.4, 147.6, 139.0, 138.7, 135.4, 132.1, 130.3, 123.7, 122.5, 115.8, 115.5, 60.6, 31.7, 29.1, 23.7, 14.1.****

**10:** FAB-HRMS: calc *m/z* = 1015.4143 [M+H]+, found 1015.4147. FTIR (KBr, cm-1): 1740.6 (CO)ester, 1690.4 (CO)amide. UV-VIS (CH2Cl2, ** nm, 10-3 , M-1cm-1): 419 (337.5) 513 (17.5), 547 (4.2), 587 (5.5), 642 (1.5). 1H NMR (CDCl3, 300K, 300 MHz): *H* 8.87 (8H, s, -pyr.), 8.66 (4H, d, *J* = 8.4 Hz, aro.), 8.6 (2H, d, *J* = 7.5 Hz, aro.), 8.00 (2H, d, *J* = 7.5 Hz, aro.), 7.89 (2H, t, *J* = 7.6 Hz, aro.), 7.56 (2H, t, *J* = 7.5 Hz, aro.), 7.55 (2H, t, *J* = 7.5 Hz, aro.), 7.55 (2H, t, *J* = 7.5 Hz, aro.), 7.04 (2H, s, -NHCO), 6.97 (2H, s, -NHCO), 3.45 (4H, q, *J* = 6.6 Hz, -**CH2**CH3), 2.18 (4H, t, *J* = 6.6 Hz, -CH2CH2-), 1.72 (4H, br s, -CH2CH2-), 1.31 (6H, br s, -CH3), 0.79 (6H, t, *J* = 6.6 Hz, -CH2**CH3**), -2.58 (2H, s, -NH pyr). 13C NMR (CDCl3, 300K, 75 MHz): *C*172.1, 169.5, 168.0, 138.3, 135.0, 131.3, 130.0, 123.3, 122.2, 115.1, 60.3, 31.16, 28.6, 24.0, 13.7.

**-5,10,15-Tris(2-(acetylamido)phenyl)--20-{2-[3-(ethoxycarbonyl)propionylamido]phenyl}-porphyrin 11**: The same experimental procedure to that of compound **8** was applied here with only a minor modification. 1.5 equivalents of ethyl succinyl chloride were added to **7** (0.05 g, 0.06 mmol) in THF. After silica gel chromatography column, desired product was obtained in 89% yield (51 mg, 0.055 mmol). Microanalysis: C56H48N8O6•CH3OH•H2O, found (calc): C, 70.02 (69.92); H, 5.14 (5.56); N, 10.83 (11.44)%. FAB-HRMS: calc *m/z* = 929.3775 [M+H]+, found 929.3763. FTIR (KBr, cm-1): 1741 (CO)ester, 1679 (CO)amide. UV-VIS (CH2Cl2, ** nm, 10-3 , M-1cm-1):419 (337.4), 514 (17.5), 547 (4.4), 587 (5.5), 643 (1.6). 1H NMR (CDCl3, 300K, 300 MHz): *H* 8.87 (8H, s, -pyr.), 8.71 (4H, brs, aro.), 7.8 (8H, br s, aro.), 7.55 (4H, br s, aro.), 6.97 (4H, s, -NHCO), 3.55 (2H, q, *J* = 6.4 Hz, -**CH2**CH3), 2.19 (2H, br s, -CH2CH2-), 1.60 (2H, br s, -CH2CH2-), 1.30 (9H, br s, -CH3), 0.87 (3H, t, *J* = 6.4 Hz, -CH2**CH3**), -2.71 (2H, s, -NH pyr). 13C NMR (CDCl3, 300K, 75 MHz): *C*135.1, 130.1, 123.2, 123.4, 121.9, 121.5, 80.0, 77.3, 60.6, 31.1, 28.5, 24.1.

**-5,15-Bis[2-(triphenylmethyl)aminophenyl]--10,20-bis(2-aminophenyl)-porphyrin 12**: 2.6 equivalents of triphenylmethyl bromide (588 mg, 1.82 mmol) were dissolved in freshly distilled THF and added dropwise to a solution containing TAPP (0.5 g, 0.7 mmol) in 250 mL THF at room temperature under argon. The mixture was stirred overnight. Solvent was evaporated to dryness and dissolved in a minimum toluene to be loaded onto a silica gel chromatography column. The 5,10 ditrityl isomer followed the tritrityl derivative and was eluted with pure toluene. This gave a 25% yield (200 mg, 0.17 mmol) of **12**. Microanalysis: C82H62N8•CH2Cl2, found (calc): C, 79.78 (80.11); H, 4.31 (4.18); N, 8.60 (9.00)%. MALDITOF-MS: *m/z* = 1159.13 [M]+. 1H NMR (CDCl3, 300K, 500 MHz): *H* 8.98 (8H, s, -pyr.), 8.01 (2H, dd, *J* = 1.2 Hz, *J* = 7 Hz, aro.), 7.67 (2H, td, *J* = 1.3 Hz, *J* = 8 Hz, aro.), 7.53 (2H, dd, *J*= 1.5 Hz, *J* = 7.8 Hz, aro.), 7.35-6.94 (38H, m, aro.), 6.73 (2H, d, *J* = 8.44 Hz, aro.), 5.41 (2H, s, -NH), 3.61 (4H, s, -NH2), -2.62 (2H, s, -NH pyr).

**-5,15-Bis{2-[3-(ethoxycarbonyl)propionylamido]phenyl}--10,20-bis(2-aminophenyl)-porphyrin 13:** 3 equivalents of ethyl succinyl chloride (73 L, 0.51 mmol)were added to a solution containing **12** (200 mg, 0.17 mmol) and excess Et3N in dry THF. After 12 hours at room temperature, solvent was evaporated and the residue dissolved in a minimum CH2Cl2. Trityl deprotection was realised by addition of 2 mL trifluoacetic acid. The mixture was then neutralised with NH3 gas until the green colour had vanished. After silica gel column chromatography, product **13** was obtained in 67% yield.Microanalysis: C56H50N8O6, found (calc): C, 71.91 (72.24); H, 4.41 (4.41); N, 12.26 (12.04)%. FAB-MS: *m/z* = 932.1 [M+H]+. UV-VIS (CH2Cl2, ** nm, 10-3 , M-1cm-1): 418 (244.9), 514 (18.8), 546 (4.4), 588 (6.0), 643 (2.1). 1H NMR (CDCl3, 300K, 500 MHz): *H* 8.99 (4H,d, *J* = 4.3 Hz, -pyr.), 8.84 (4H, d, *J* = 4.3 Hz, -pyr.), 8.70 (2H, d, *J* = 7.8 Hz, aro.), 8.02 (2H, d, *J* = 6,9 Hz, aro.), 7.90 (2H, d, *J* = 7,3 Hz, aro.), 7.85 (2H, t, *J* = 8.1 Hz, aro.), 7.66 (2H, t, *J* = 7.8 Hz, aro.), 7.54 (2H, t, *J* = 7.3 Hz, aro.), 7.22 (2H, t, *J* = 7.3 Hz, aro.), 7.16 (2H, d, *J* = 8.1 Hz, aro.), 7.01 (2H, s, -NHCO), 3.63 (4H, s, -NH2), 3.52 (4H, br q, *J* = 4.5 Hz, -**CH2**CH3), 2.19 (4H, t, *J* = 6.8 Hz, -CH2CH2), 1.64 (4H, t, *J* = 6.3 Hz, -CH2CH2), 0.84 (6H, t, *J* = 6.3 Hz, -CH2**CH3**), -2.63 (2H,s, -NH pyr). 13C NMR (CDCl3, 300K, 125 MHz): *C*172.4, 169.9, 147.2, 138.8, 135.3, 132.3, 131.5, 130.4, 130.2, 126.8, 123.5, 121.9, 118.1, 117.3, 115.9, 114.4, 60.7, 31.9, 29.2, 14.2.

**-5,10-Bis{2-[3-(ethoxycarbonyl)propionylamido]phenyl}--15,20-bis[2-(acetylamido)phenyl]-porphyrin 9:** (from alternative route): **13** (0.15 g, 0.16 mmol) was dissolved in 20 mL THF under argon. 3 equivalents acetyl chloride (34 L, 0.48 mmol) were added dropwise at 0°C. This was stirred for 4 hours and the solvent was evaporated to dryness. The residue was dissolved in a minimum CH2Cl2 and poured on a silica gel chromatography column. Product was eluted with CH2Cl2 and obtained in 85% yield (140 mg, 0.14 mmol).

Bismuth complexes

**2Bi(NO3):** The same experimental procedure to that of compound **1BiNO3** was applied here. This gave **2BiNO3** in 83% yield. Microanalysis: C64H56BiN9O15•H2O•CH3OH, found(calc): C, 53.82 (53.83); H, 4.25 (4.31); N, 8.38 (8.69)%. FAB-MS: *m/z* = 1338.0 [M-NO3]+. FTIR (KBr, cm-1): 1737 (CO)ester, 1694 (CO)amide, 1384 (NO3), 992 (Bi-Np). 1H NMR (CDCl3, 300K, 500 MHz): *H* 9.21 (8H, s, -pyr.), 8.83 (4H, d, *J* = 7.9 Hz, aro.), 8.69 (4H, s, -NHCO), 7.94 (4H, d, *J* = 7.09 Hz, aro.), 7.91 (4H, td, *J* = 1.22 Hz, *J* = 7.83 Hz, aro.), 7.56 (4H, t, *J* = 7.21 Hz, aro.), 3.24 (8H, q, *J* = 6.7 Hz, -**CH2**CH3), 2.84 (8H, s, -CH2-), 0.76 (12H, t, *J* = 6.7 Hz, -CH2**CH3**). 13C NMR (CDCl3, 300K, 125 MHz) : *C* 169.2, 163.9, 149.5, 140.4, 134.2, 133.5, 130.8, 123.6, 121.9, 118.8, 61.4, 42.9, 13.9.

**3Bi(NO3):** The same experimental procedure to that of compound **1BiNO3** was applied here. This gave **3BiNO3** in 85% yield. Microanalysis: C68H64BiN9O15•3H2O, found (calc): C, 54.05 (54.08); H, 4.38 (4.67); N, 7.98 (8.35)%. FAB-MS: *m/z* = 1393.8 [M-NO3]+. UV-VIS (CH2Cl2,  nm, 10-3 , M-1cm-1) : 350 (42.5), 471 (154.9), 597 (9.7), 643 (7.9). FTIR (KBr, cm-1) : 1733 (CO)ester, 1685 (CO)amide, 1384 (NO3), 991 (Bi-Np). 1H (CDCl3, 300K, 500 MHz): *H* 9.21 (8H, s, -pyr.), 8.63 (4H, br s, aro.), 8.04 (4H, br s, -NHCO), 7.89 (4H,t, *J* = 7.9 Hz, aro.), 7.85 (4H, d, *J* = 6.5 Hz, aro.), 7.53 (4H, t, *J* = 7.1 Hz, aro.), 3.14 (3H, br s, -CH3), 3.01 (9H, br s, -CH3), 1.72 (16H, br s, -CH2CH2), 1.33 (8H, m, -CH2CH2). 13C NMR (CDCl3, 300K, 75 MHz) : *C* 174.1, 171.6, 149.3, 140.3, 134.8, 133.5, 131.9, 130.4, 123.7, 119.5, 51.5, 35.5, 32.9, 20.8.

**8BiNO3:**The same experimental procedure to that of compound **1BiNO3** was applied here. Product **8BiNO3** was obtained in 80% yield. Microanalysis: C64H58BiN9O13•H2O, found (calc): C, 55.50 (55.37); H, 4.31 (4.36); N, 8.48 (9.08)%. FAB-MS: *m/z* = 1307.7 [M-NO3]+. FTIR (KBr, cm-1): 1732 (CO)ester, 1695 (CO)amide, 1384 (NO3), 990 (Bi-Np). UV-VIS (CH2Cl2, ** nm, 10-3 , M-1cm-1): 352 (42.9), 472 (150.1), 599 (9.9), 644 (8.5). 1H NMR (CDCl3, 320K, 500MHz): *H* 9.22 (8H, br s, -pyr.), 8.86-8.49 (4H, m, aro.), 8.17 (4H, br s, -NHCO), 7.99 (4H, m, aro.), 7.88 (4H, t, *J* = 7.6 Hz, aro.), 7.56 (4H, m, aro.), 3.29 (6H, br s, -**CH2**CH3), 2.05 (4H, s, -CH2CH2), 1.91 (6H, m, -CH2CH2), 1.82 (2H, s, -CH2CH2), 1.45 (3H, s, -CH3), 0.88 (9H, m, -CH2**CH3**). 13C NMR (CDCl3, 320K, 125 MHz): *C*173.6, 170.8, 149.2, 140.3, 134.8, 133.5, 130.5, 123.9, 123.6, 122.9, 119.2, 60.9, 31.5, 29.5, 29.3, 24.2, 14.1.

**9BiNO3:**The same experimental procedure to that of compound **1BiNO3** was applied here. This gave **9BiNO3** in 75% yield. Microanalysis: C60H52BiN9O11•H2O, found (calc): C, 55.54 (55.34); H, 4.46 (4.18); N, 9.33 (9.68)%. FAB-MS: m/z = 1221.37 [M-NO3]+. FTIR (KBr, cm-1): 1384 (NO3), 991 (Bi-Np). UV-VIS (CH2Cl2, ** nm, 10-3 , M-1cm-1): 353 (37.3), 471 (147.5), 599 (9.3), 646 (8.1). 1H NMR (CDCl3, 300K, 500 MHz): *H* 9.21 (8H, s, -pyr.), 8.61 (4H, br s, aro.), 7.85 (8H, t, *J* = 7.8 Hz, aro.), 7.51 (4H, br s, aro.), 7.05 (4H, s, -NHCO), 3.32 (4H, br s, -**CH2**CH3), 2.01 (4H, br s, -CH2CH2-), 1.88 (4H, br s, -CH2CH2-), 1.33 (6H, br s, -CH3), 0.86 (6H, br s, -CH2**CH3**). 13C NMR (CDCl3, 300K, 125 MHz): *C*173.3, 170.7, 149.2, 140.3, 134.9, 133.2, 130.4, 123.4, 119.2, 60.7, 31.7, 29.6, 23.8, 14.1.

**10BiNO3:** The same experimental procedure to that of compound **1BiNO3** was applied here. This gave **10BiNO3** in 79% yield. ESI-HRMS: calc m/z = 1221.3726 [M-NO3]+, found 1221.3726. FTIR (KBr, cm-1): 1384 (NO3), 992 (Bi-Np). UV-VIS (CH2Cl2, ** nm, 10-3 , M-1cm-1):350 (30.5), 472 (130.6), 598 (9.5), 644 (8.8). 1H NMR (CDCl3, 300K, 500 MHz):*H* 8.85 (8H, s, -pyr.), 8.28 (4H, br s, aro.), 7.84 (8H, t, *J* = 7.6 Hz, aro.), 7.50 (4H, br s, aro.), 7.04 (4H, s, -NHCO), 3.87 (4H, q, *J* = 7.0Hz, -**CH2**CH3), 2.29 (4H, br s, -CH2-), 2.06 (4H, br s, -CH2-), 1.41 (6H, br s, -CH3), 1.08 (6H, br s, -CH2**CH3**). 13C NMR (CDCl3, 300K, 75 MHz): *C*144.66, 142.90, 132.67, 129.71, 126.79, 60.31, 29.10, 23.61, 13.97.

**11BiNO3:** The same experimental procedure to that of compound **1BiNO3** was applied here. This gave **11BiNO3** in 80% yield. Microanalysis: C56H46BiN9O9•CH2Cl2• CH3OH, found (calc): C, 53.48 (52.98); H, 4.02 (3.99); N, 8.72 (9.59)%. ESI-HRMS: calc m/z = 1135.3344 [M-NO3]+, found 1135.3345. FTIR (KBr, cm-1): 1384 (NO3), 991 (Bi-Np). UV-VIS (CH2Cl2, ** nm, 10-3 , M-1cm-1): 353 (39.2), 473 (162.1), 601 (9.8), 648 (8.7). 1H NMR (DMSO-d6, 298K, 500 MHz): *H* 9.03 (8H, s, -pyr.), 8.69 (4H, br s, aro.), 8.38 (4H, br s, aro.), 7.95 (4H, br s, aro.), 7.86 (4H, t, *J* = 8.0 Hz, aro.), 7.53 (4H, s, -NHCO), 3.85 (2H, q, *J* = 7.0 Hz, -**CH2**CH3), 2.26 (2H, br s, -CH2-), 1.94 (2H, br s, -CH2-), 1.45 (br s, 9H, -CH3), 1.03 (3H, t, *J* = 7.0 Hz, -CH2**CH3**). 13C NMR (CDCl3, 300K, 75 MHz): *C* 169.13, 149.39, 149.01, 133.55, 130.10, 129.01, 122.85, 118.44, 67.42, 60.15, 40.30, 39.20, 28.84, 24.34, 14.36.
